# Supplementary material
Source: PubMed Central journal article supplement (PMC3430954)
Supplement: CJN.02240312_CJN02240312SupplementaryData.pdf [file CJN.02240312_CJN02240312SupplementaryData.pdf]

# Serum $\beta$ -Trace Protein and Risk of Mortality in Incident Hemodialysis Patients

## Authors and Affiliations:

Tariq Shafi, MBBS, MHS <sup>1,2</sup>

Rulan S. Parekh, MD, MS <sup>3,4</sup>

Bernard G. Jaar, MD, MPH <sup>1,2,3,5</sup>

Laura C. Plantinga, ScM <sup>6</sup>

Pooja C. Oberai, MBBS, MS <sup>3</sup>

John H. Eckfeldt, MD, PhD <sup>7</sup>

Andrew S. Levey, MD <sup>8</sup>

Neil R. Powe, MD, MPH, MBA <sup>9</sup>

Josef Coresh, MD, MHS, PhD <sup>1,2,3,10</sup>

<sup>1</sup> Department of Medicine, Johns Hopkins University School of Medicine, Baltimore, Maryland

<sup>2</sup> Welch Center for Prevention, Epidemiology and Clinical Research, Johns Hopkins Medical Institutions, Baltimore, Maryland

<sup>3</sup> Department of Epidemiology, Johns Hopkins Bloomberg School of Public Health, Baltimore, Maryland

<sup>4</sup> Departments of Pediatrics, Hospital for Sick Children and Medicine, University Health Network, and University of Toronto, Ontario, Canada

<sup>5</sup> Nephrology Center of Maryland, Baltimore, Maryland

<sup>6</sup> Department of Epidemiology, Rollins School of Public Health, Emory University, Atlanta, GA

<sup>7</sup> Department of Laboratory Medicine and Pathology, University of Minnesota, Minneapolis, Minnesota

<sup>8</sup> Department of Medicine, Division of Nephrology, Tufts Medical Center, Boston, Massachusetts

<sup>9</sup> Department of Medicine, San Francisco General Hospital and University of California, San Francisco, California

<sup>10</sup> Department of Biostatistics, Johns Hopkins Bloomberg School of Public Health, Baltimore, Maryland
